# Supplementary material for: Preparation of thermochromic cholesteric liquid crystal microcapsules with a planar alignment via stepwise interfacial polymerization
Source: Royal Society of Chemistry journal article supplement (doi:10.1039/d5tc00866b), 2025-01-01
Supplement: d5tc00866b1.pdf [file d5tc00866b1.pdf]

## Supporting Information

### Preparation of thermochromic Cholesteric Liquid Crystal Microcapsules with planar alignment by stepwise interfacial polymerization

Hongbo Lu, <sup>\*ab</sup> Xiaoyu Chang, <sup>ab</sup> Beibei He, <sup>ab</sup> Shunpin Mo, <sup>ab</sup> and Longzhen Qiu, <sup>ac</sup> Jun Zhu <sup>ab</sup>  
and Miao Xu <sup>a</sup>

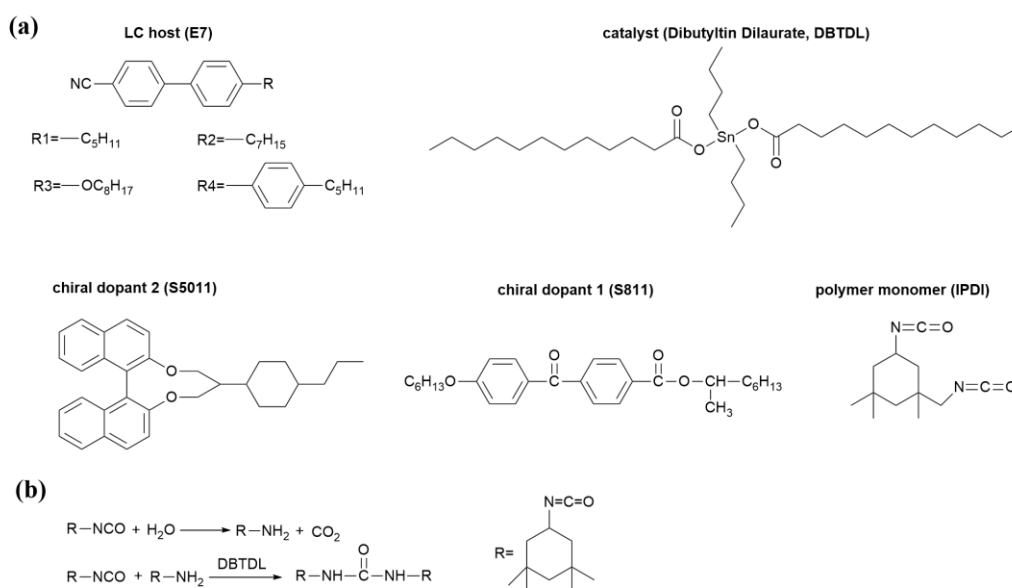

**Fig. S1** (a) Chemical structures of the molecules used in the CLC microcapsules. (b) Reaction mechanism of polyurea.

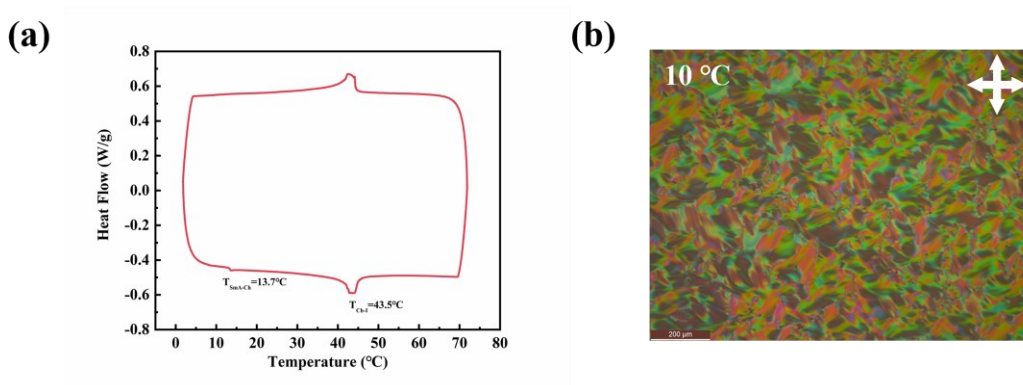

**Fig. S2** (a) DSC heating-cooling curves of the CLC mixture (LC host E7). (b) The POM image of CLC mixture at 10 °C.

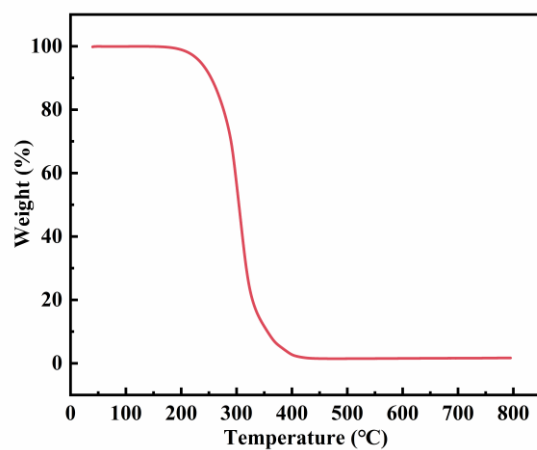

**Fig. S3** TGA curves of the CLC microcapsules

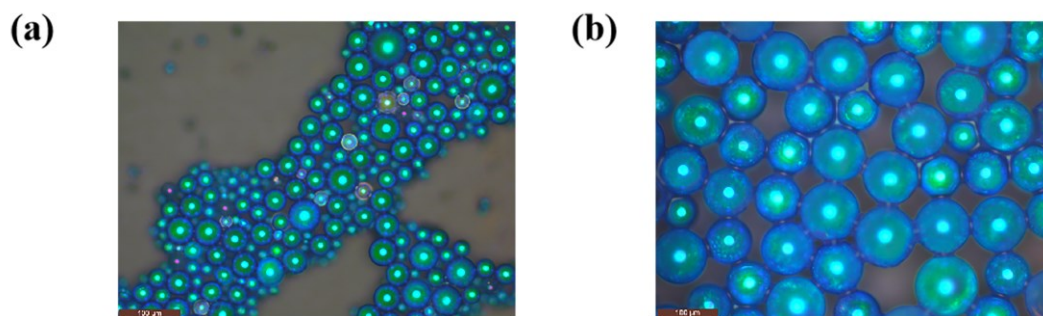

**Fig. S4** (a) The OM image of microcapsules with diameters below 70 μm. (b) The OM image microcapsules with diameters above 70 μm.

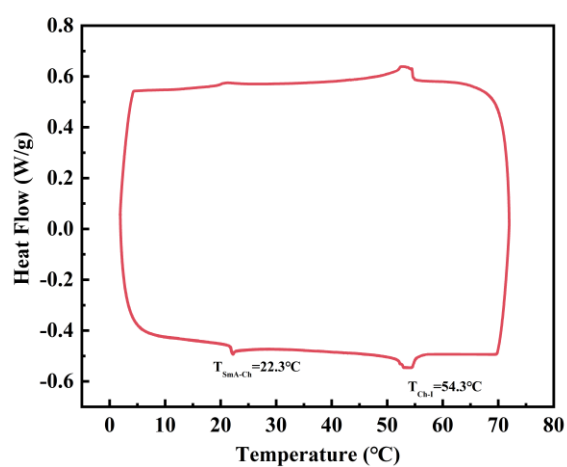

**Fig. S5** DSC heating-cooling curves of the CLC mixture (LC host HNG715500-000).
